# Supplementary material
Source: PubMed Central journal article supplement (PMC3436110)
Supplement: supp_dev.082222_DEV082222.pdf [file supp_dev.082222_DEV082222.pdf]

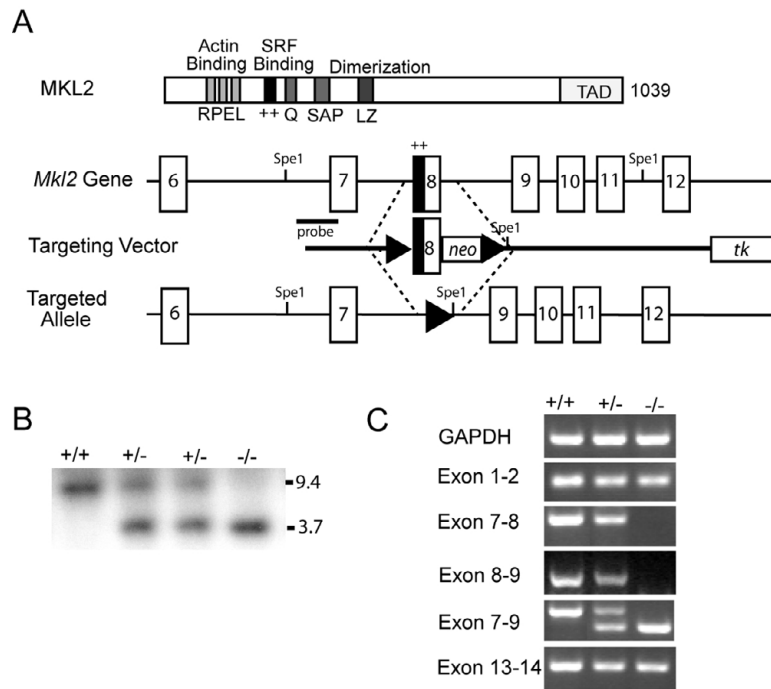

**Fig. S1. Generation and characterization of *Mkl2*<sup>-/-</sup> null embryos.** (A) Schematic representation of the MKL2 protein and the gene targeting strategy used in this manuscript. The locations of the RPEL, Basic, Glutamine-rich (Q), SAP and transcriptional activation (TD) domains and leucine zipper (LZ) are shown. A schematic representation of exons 6-12 (rectangles) of the mouse *Mkl2* gene, including the location restriction enzyme sites used to genotype ES cells and mice. The position of the DNA probe used for Southern blot analysis is indicated below (black rectangle). The targeted allele contains the PGK-neomycin resistance (*neo*) cassette and loxP sites (triangles) flanking exon 8. (B) Southern blot analysis of mouse genomic DNA demonstrating the 9.4 kb wild-type allele (+) and the 3.7 kb null allele generated after Cre-mediated recombination. (C) PCR genotype analysis showing the expected bands corresponding to the wild-type allele (+) and conditionally targeted allele (-) following Cre-mediated recombination. PCR primers complementing the specific exons indicated are shown on the right of the ethidium bromide-stained agarose gel.

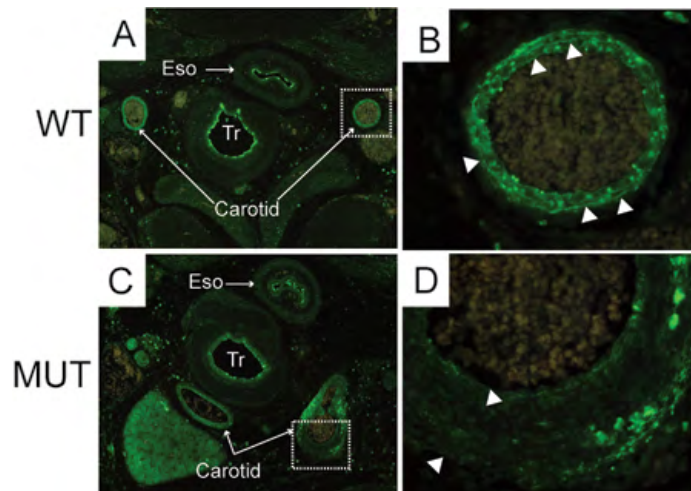

**Fig. S2. Disruption of elastin organization in the carotid artery of E13.5 *Mkl2*<sup>-/-</sup> mutant embryos.** Histological sections were prepared from E13.5 wild-type (WT) and *Mkl2*<sup>-/-</sup> (MUT) embryos were immunostained with anti-tropoelastin antibody (green). (A,C) Histological transverse sections cut at the level of the common carotid arteries in wild-type control (A) and *Mkl2*<sup>-/-</sup> mutant (MUT) embryo. The location of the trachea (Tr) and esophagus (Eso) are shown. The white rectangles indicate the sections shown in B and D. Original magnification was  $\times 40$ . (B,D) High-power magnification reveals the structure of the tunica media in the left common carotid artery in a wild-type (B) and mutant (D) embryo. In the wild-type carotid, thin elastin fibers (arrows, green stain) are visualized between layers of spindle shaped vascular SMCs. By contrast, medial organization of the mutant artery is disrupted with attenuated or absence of tropoelastin staining in segments of the artery (arrows) and irregular deposition of elastin in other other segments. Original magnification was  $\times 400$ .

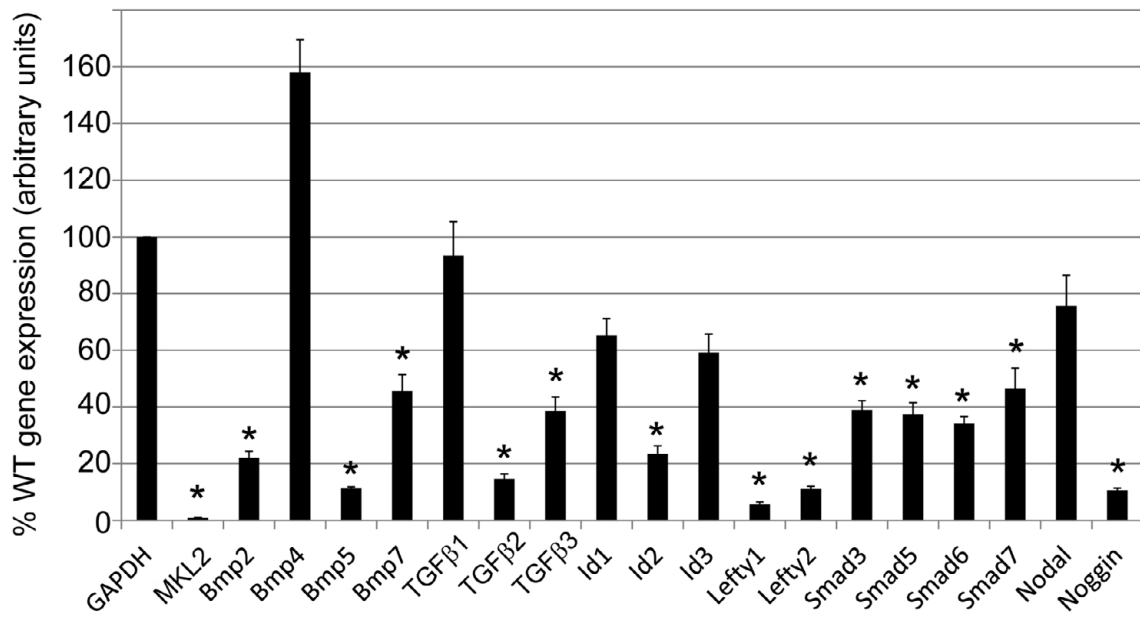

**Fig. S3. Multiple TGF-β/BMP genes are downregulated in *Mkl2*<sup>-/-</sup> ES cells.** To validate the microarray studies, qRT-PCR analyses were performed with mRNA harvested from wild-type and *Mkl2*<sup>-/-</sup> ES cells. The experiment was performed three times with three biological replicates used in each experiment. Data are expressed as the percentage of wild-type gene expression (arbitrary units) observed in *Mkl2*<sup>-/-</sup> ES cells±s.e.m. (\**P*<0.01 versus wild-type gene expression).

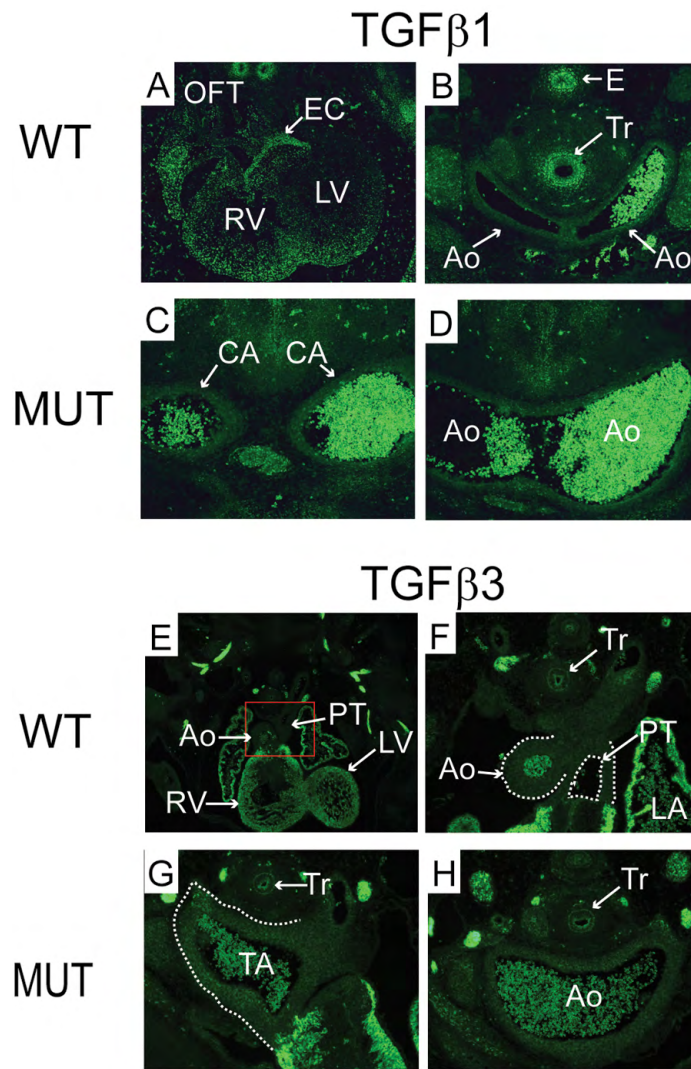

**Fig. S4. Expression of TGFβ1 and TGFβ3 in the cardiac outflow tract and great arteries of E14.5 control and *Mkl2*<sup>-/-</sup> embryos.** Histological sections cut at the level of the cardiac outflow tract of wild-type (WT) control and *Mkl2*<sup>-/-</sup> mutant embryos were immunostained with antibodies that recognize TGFβ1 (A-D) or TGFβ3 (E-H). (A-D) Abundant TGFβ1 (green stain) is observed throughout the embryonic RV and LV myocardium and endocardial cushions (EC) (A). By contrast, TGFβ1 (green stain) was expressed background levels (IgG) in the aortic arch (Ao) and carotid arteries (CA). The location of the trachea (Tr) and esophagus (E) are shown. Original magnifications were ×20 in A; ×100 in B-D. (E,F) Abundant TGFβ3 (green stain) is observed throughout the LV and RV myocardium of the control embryo. The red rectangle in E demarcates the location of F. By contrast, very low levels of TGFβ3 are observed in the ascending aorta (Ao) and pulmonary trunk (PT), whereas abundant TGFβ3 is observed in the LA. (G,H) In addition, low levels of TGFβ3 are observed in the wall of the truncus arteriosus (TA) and arch of the aorta (Ao) of *Mkl2*<sup>-/-</sup> mutant embryos. No appreciable difference in TGFβ3 expression was observed in the great arteries of wild-type and MUT embryos. Original magnifications were ×20 in E and ×100 in F-H.

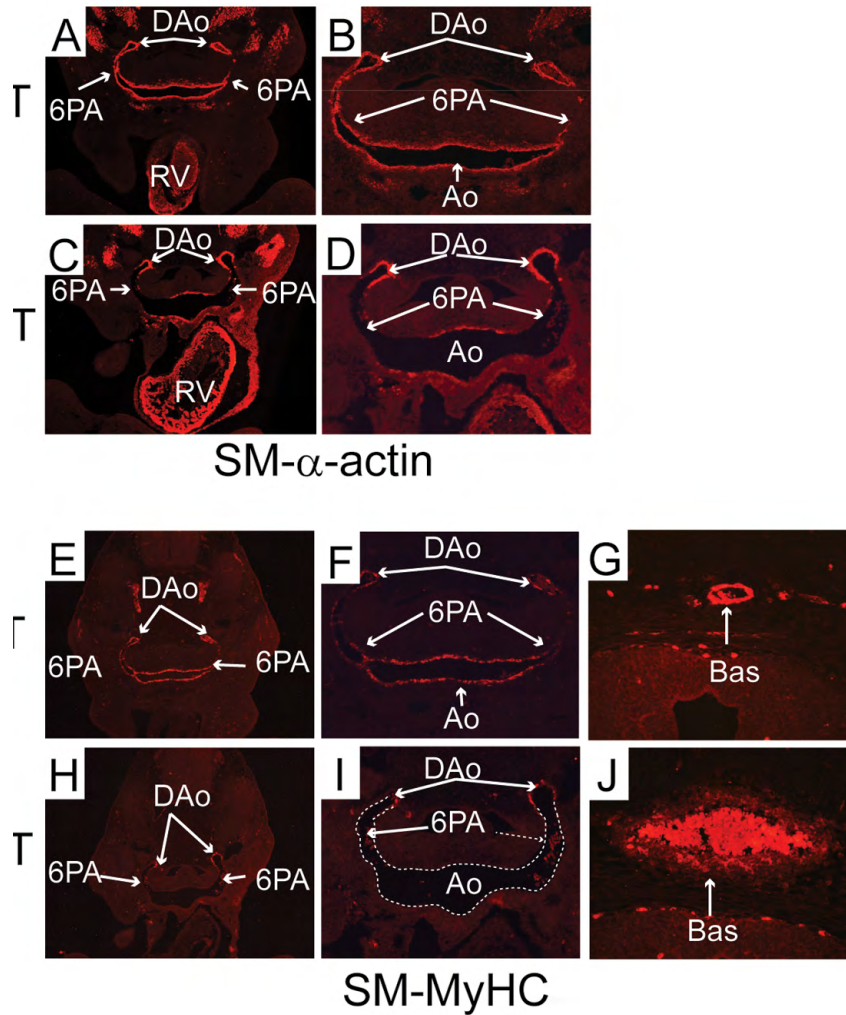

**Fig. S5. Expression of SMC contractile proteins is downregulated in arteries of *Mkl2*<sup>-/-</sup> mutant embryos.** (A-D) Histological sections prepared from E9.5 wild-type control (A,B) and *Mkl2*<sup>-/-</sup> mutant (MUT) embryos were immunostained with SM- $\alpha$ -actin (SMA) antibody. (A,B) Abundant SMA (red) is observed throughout the embryonic RV, pharyngeal arch arteries (6PA) and dorsal aorta (DAo) in wild-type embryos. (C,D) By contrast, expression of SMA is markedly attenuated in the pharyngeal arch arteries (6PA) and aorta (Ao) of *Mkl2*<sup>-/-</sup> mutant embryos. Of note, SMA expression is preserved in the dorsal aorta (DAo) and embryonic RV. Original magnifications were  $\times 50$  in A,C;  $\times 100$  in B,D. (E-J) Histological sections prepared from E9.5 wild-type control (E-G) and *Mkl2*<sup>-/-</sup> MUT (H-J) embryos were immunostained with SM-myosin heavy chain (SM-MyHC) antibody. (E,F) Abundant SM-MyC (red) is observed throughout the pharyngeal arch arteries (6PA) and dorsal aorta (DAo) in wild-type embryos. (H,I) By contrast, expression of SM-MyHC is markedly attenuated in the pharyngeal arch arteries (6PA) and aorta (Ao) of *Mkl2*<sup>-/-</sup> mutant embryos. Once again, SM-MyHC expression is preserved in the dorsal aorta (DAo). (G,J). Histological sections showing the basilar artery (Bas) demonstrating that expression of SM-MyHC is markedly attenuated in the mutant basilar artery (J) compared with the basilar artery in the wild-type embryo (G). Original magnifications were  $\times 50$  in E,H,  $\times 100$  in F,I and  $\times 200$  in G,J.

**Table S1. PCR primers used in these studies*****Mkl2* genotyping primers**

|    |                                   |
|----|-----------------------------------|
| P1 | F, 5'-ATACAACCCGCTTTTTAATAGG-3'   |
| P2 | F, 5'-ATCTGTACAGCTTGAAACCTGGCC-3' |
| P3 | R, 5'-TTCCCATTTCCACACGCTGATGTT-3' |

**qRT-PCR primers**

|          |                                                                         |
|----------|-------------------------------------------------------------------------|
| GAPDH    | F, 5'-AGTCCATGCCATCACTGCCACCCA-3'<br>R, 5'-TCCACCACCCTGTTGCTGTAGCCG-3'  |
| SRF      | F, 5'-CCCGCTCAGACCCACACAGA-3'<br>R, 5'-CAGGTAGTTGGTGTGGGGAAGGA-3'       |
| MKL1     | F, 5'-ACACTCATCAAGCAAAGCCAACCC-3',<br>R, 5'-GATCTTGGCATAGGAGGAGTCCAT-3' |
| MKL2     | F, 5'-AACCCCTCTAACTGCAGAC-3'<br>R, 5'-GCTACGGTGTGTCGTTG-3'              |
| TGFβ1    | F, 5'-ACCCTGCCCTATATTTGGA-3',<br>R, 5'-TGGTTGTAGAGGGCAAGGAC-3'          |
| TGFβ2    | F, 5'-GAACCCAAAGGGTACAATGC-3',<br>R, 5'-TGGTGTGTACAGGCTGAGG-3'          |
| TGFβ3    | F, 5'-TATGCCAATTCTGCTCAGG-3'<br>R, 5'-CTCTGGGTTCCAGGGTGTGT-3'           |
| SMA      | F, 5'-TACCATGTACCCTGGCATTGCTGA-3'<br>R, 5'-AGAAGGCCCTCTGACTTTAGAAGC-3'  |
| SMMyc    | F, 5'-CTCTGTGCTGCACAACCTGA-3'<br>R, 5'-TCGGCAATGGCATAGATGTG-3'          |
| Fn       | F, 5'-AGACCTGGGAAAAGCCCTACCAA-3'<br>R, 5'-ACTGAAGCAGGTTTCCTCGGTTGT-3'   |
| Col4a1   | F, 5'-TGGATCGGCTATTCCTTCG-3'<br>R, 5'-GGCGCTTCTAACTCTTCC-3'             |
| Fbn1     | F, 5'-CTGTCCACCAGGATACTTCC-3'<br>R, 5'-CAGTGAGTTGTCGTCCATC-3'           |
| Itgα5    | F, 5'-GCACCACCATTCAATTTGAC-3'<br>R, 5'-CACTGCAAGGACTTGTACTC-3'          |
| Itgβ5    | F, 5'-GAATGCCTGTTGATCCACC-3'<br>R, 5'-GGATGAGGTTTGCCTTCAG-3'            |
| Itgβ8    | F, 5'-CTGCAAATGTGGTCTCCTGTGC-3'<br>R, 5'-CGTTCACTTCCTGATCCACCTG-3'      |
| Talin    | F, GCTCGGGCGTTAGCAGTC-3'<br>R, ATGGAATCTGAGACAGTCCGAGA-3'               |
| Vinculin | F, 5'-CCAAGGTCAGAGAAGCCTTCC-3'<br>R, 5'-CGTAGCTGTTCAAGGTCTGGTG-3'       |
| Id1      | F, 5'-GGAGATCCTGCAGCATGTAATC-3'<br>R, 5'-ATCGTCGGCTGGAACACATG-3'        |
| Id2      | F, 5'-TGGACTCGCATCCCACTATC-3'<br>R, 5'-CATTCGACATAAGCTCAGAAGG-3'        |

|        |                                                                                 |
|--------|---------------------------------------------------------------------------------|
| Id3    | 5'-GCGTGTTCATAGACTACATCCTC-3'<br>R,5'-CCTCTTGTCTTGGAGATCAC-3'                   |
| Bmp2   | F,5'-GAATCAGAACAACAAGTCA GT-3'<br>R,5'-GTTTGTGTTTGGCTTGACGC-3'                  |
| Bmp4   | F,5'-TGTGAGGAGTTTCCATCACG-3'<br>R,5'-CAGCGAAGGACTGCAGGGCT-3'                    |
| Bmp5   | F, 5'-GGATGGCCGCAGCATCAATGTAAA-3'<br>R, 5'-GAAGGCCACCATGAATGGCTGTTT-3'          |
| Bmp7   | F, 5'-ACCGCAGCCGAATTCAGGATCTAT-3'<br>R, 5'-TATCAAACACCAACCAGCCCTCCT-3'          |
| Smad3  | F,5'- CCAGGCTGACATGGGCAAATGAAA-3'<br>R, 5'-TGTCACAGTTTGCTGTGGCAATCC-3'          |
| Smad5  | F, 5'-AGCAAGAGTGTGTGTCAGCTCCATGA-3'<br>R,5'- TCCTGAAGGCTGCCAAGTAAAGGA-3'        |
| Smad6  | F, 5'-ACAAGCCACTGGATCTGTCCGATT-3'<br>R, 5'-AGAATTCACCCGGAGCAGTGATGA-3'          |
| Smad7  | F, 5'-TTCGGACAACAAGAGTCAGCTGGT-3'<br>R, 5'-AGCCTTGATGGAGAAACCAGGGAA-3'          |
| Smad9  | F,5'- TGACGGCAGGTACATTCAACCAGA-3'<br>R,5'- TTAAGAGCCTTGGCTTTGCTTGCC-3'          |
| Lefty1 | F,5'-ATGATTGTCAGCGTGAAGGAGGGA-3'<br>R,5'- TTGCATGAAAGGCACATCCTTGGG-3'           |
| Lefty2 | F,5'-TCCTGACGTATGAATGTGTGGGCA-3'<br>R,5'- ACTGACAATCATGGGCAAGGAGGT-3'           |
| Nodal  | F,5'- ACATGATTGTGGAGGAGTGTGGGT-3',<br>R,5'- TCTTTAGCTCCAGCAGGCAGAACT-3'         |
| Noggin | F,5'-TGAGCAAGAAGCTGAGGAGGAAGT-3'<br>R,5'-AGGTGCACAGACTTGGATGGCTTA-3'            |
| Pitx2  | F,5'-ATG GAG ACC AAT TGT CGC AAA C-3',<br>R,5'-GCT TCC GTA AGG TTG GTC CAC A-3' |

### ChIP assay primers

|         |                                                                      |
|---------|----------------------------------------------------------------------|
| Control | F,5'-ATGCTAAGTAATGGGACATTGCT-3'<br>R,5'-AAGTCAGCTCTGCTTCCAGG-3'      |
| CArg1   | F,5'-CTGGGGCTGACCTTGAAGGAAGAA-3'<br>R,5'-TTCTTCTACTCCACTGGCCCTGAG-3' |
| CArg2   | F,5'-ATGGGGACCAAACCAAAGGAT-3',<br>R,5'-ACTTCTCTACGCAAAGGGCACTG-3'    |
| CArg3   | F,5'-AAACAGTTGGGTCCCGTCCA-3'<br>R,5'-GAACACTATTCTGGGAGCCA,-3'        |
| CArg4   | F,5'-CTATCCCTTTCCTCCCGAGCTGTC-3'<br>R,5'-ACACACACACACACACATGAC-3'    |
| CArg5   | F,5'-GTGGTTGATTTTCATGTTGTGG-3'<br>R,5'-CAGAGAGTCTGCCTTTTTAGG-3'      |

**Table S2. Primary and secondary antibodies used in these studies**

| <b>Primary antibodies</b>                   | <b>Catalog code</b> | <b>Vendor</b>             |
|---------------------------------------------|---------------------|---------------------------|
| polyclonal anti-fibronectin                 | NB100-92247         | Novus Biologicals         |
| monoclonal anti-fibronectin                 | sc-8422             | Santa Cruz Biotechnology  |
| polyclonal anti-GAPDH                       | G9545               | Sigma                     |
| polyclonal anti- $\beta$ -tubulin           | ab6046              | Abcam                     |
| polyclonal anti-tropoelastin                | ab21601             | Abcam                     |
| monoclonal anti-phospho Smad3               | CG1561              | Cell Applications         |
| monoclonal anti-TGF $\beta$ 2               | MAB612              | R&D systems               |
| monoclonal anti-smooth muscle-actin (1A4)   | A5228               | Sigma-Aldrich             |
| polyclonal anti-phospho-paxillin (Tyr118)   | 2541                | Cell Signaling Technology |
| polyclonal anti-collagen IV                 | AB756P              | Millipore                 |
| polyclonal Anti-SRF (G20)                   | sc335               | Santa Cruz                |
| Rabbit IgG                                  | 2729                | Cell Signaling Technology |
|                                             |                     |                           |
| <b>Secondary antibodies</b>                 |                     |                           |
| Alexa Fluor® 488 Goat Anti-Mouse IgG        | A-11001             | Invitrogen                |
| Alexa Fluor® 488 Rabbit Anti-Mouse IgG      | A-11059             | Invitrogen                |
| Alexa Fluor® 568 Goat Anti-Rabbit IgG       | A11011              | Invitrogen                |
| Alexa Fluor® 568 Goat Anti-Mouse IgG        | A-11004             | Invitrogen                |
| Alexa Fluor® 594 Donkey Anti-Goat IgG (H+L) | 705-585-003         | Jackson ImmunoResearch    |
| Donkey anti-mouse IgG HRP                   | 715-035-150         | Jackson ImmunoResearch    |
|                                             |                     |                           |

**Table S3. Genes induced or repressed by twofold or more in response to *Mki2* deletion**  
Owing to the small number of replicates, no statistical analysis is provided and data are regarded as exploratory

| <b>Induced genes</b>      |                    |                              |                                                               |
|---------------------------|--------------------|------------------------------|---------------------------------------------------------------|
| <b>Transcript cluster</b> | <b>Gene symbol</b> | <b>mRNA Accession Number</b> | <b>Fold change (<i>Mki2</i><sup>-/-</sup> versus control)</b> |
| 10369615                  | Srgn               | NM_011157                    | 30.57                                                         |
| 10480155                  | Cubn               | NM_001081084                 | 7.32                                                          |
| 10458262                  | Slc23a1            | NM_011397                    | 3.14                                                          |
| 10561153                  | Cyp2b23            | NM_001081148                 | 3.02                                                          |
| 10499412                  | Rab25              | NM_016899                    | 2.91                                                          |
| 10446473                  | Lama1              | NM_008480                    | 2.74                                                          |
| 10484276                  | Neurod1            | NM_010894                    | 2.34                                                          |
| 10351368                  | Gpa33              | NM_021610                    | 2.20                                                          |
| 10436978                  | Cbr3               | NM_173047                    | 2.16                                                          |
| 10474575                  | Slc12a6            | BC062099                     | 2.02                                                          |
| 10570516                  | Kbtbd11            | BC080858                     | 2.00                                                          |
| <b>Repressed genes</b>    |                    |                              |                                                               |
| <b>Transcript cluster</b> | <b>Gene symbol</b> | <b>mRNA Accession Number</b> | <b>Fold change (<i>Mki2</i><sup>-/-</sup> versus control)</b> |
| 10606837                  | Nxf3               | NM_001024141                 | 0.50                                                          |
| 10369388                  | Unc5b              | NM_029770                    | 0.50                                                          |
| 10397346                  | Fos                | NM_010234                    | 0.50                                                          |
| 10454701                  | Wnt8a              | NM_009290                    | 0.49                                                          |
| 10604961                  | Gabra3             | NM_008067                    | 0.49                                                          |
| 10569344                  | Igf2               | NM_001122737                 | 0.49                                                          |
| 10602925                  | Phka2              | NM_172783                    | 0.49                                                          |
| 10359161                  | Soat1              | NM_009230                    | 0.49                                                          |
| 10519951                  | Pion               | NM_175437                    | 0.49                                                          |
| 10427402                  | Ghr                | NM_010284                    | 0.49                                                          |
| 10408937                  | Atxn1              | NM_009124                    | 0.49                                                          |
| 10377938                  | Eno3               | NM_007933                    | 0.48                                                          |
| 10444258                  | Psmb8              | NM_010724                    | 0.48                                                          |
| 10352320                  | Tmem63a            | NM_144794                    | 0.48                                                          |
| 10503835                  | Rragd              | NM_027491                    | 0.48                                                          |
| 10505132                  | Akap2              | NM_001035533                 | 0.48                                                          |
| 10583203                  | Phxr4              | BC107288                     | 0.48                                                          |
| 10602805                  | Mtap7d2            | NM_001081124                 | 0.48                                                          |
| 10560481                  | Fosb               | NM_008036                    | 0.48                                                          |
| 10347277                  | Igfbp2             | NM_008342                    | 0.48                                                          |



|          |          |              |      |
|----------|----------|--------------|------|
| 10484307 | Frzb     | NM_011356    | 0.47 |
| 10513256 | Lpar1    | NM_010336    | 0.47 |
| 10406270 | Glrx     | NM_053108    | 0.47 |
| 10461629 | Ms4a4d   | NM_025658    | 0.47 |
| 10415411 | Nynrin   | BC057379     | 0.47 |
| 10545780 | Exoc6b   | BC145693     | 0.47 |
| 10599120 | Dock11   | NM_001009947 | 0.47 |
| 10571601 | Pdlim3   | NM_016798    | 0.47 |
| 10385036 | Fgf18    | NM_008005    | 0.47 |
| 10361771 | Plagl1   | NM_009538    | 0.47 |
| 10485982 | Actc1    | NM_009608    | 0.47 |
| 10442194 | Zfp677   | NM_172486    | 0.46 |
| 10604633 | Cxx1b    | NM_001018063 | 0.46 |
| 10406229 | Pcsk1    | NM_013628    | 0.46 |
| 10497817 | Anxa5    | NM_009673    | 0.46 |
| 10366546 | Cpm      | NM_027468    | 0.46 |
| 10468070 | Fgf8     | NM_010205    | 0.46 |
| 10606609 | Tspan6   | NM_019656    | 0.46 |
| 10469936 | Nrarp    | NM_025980    | 0.46 |
| 10496569 | Gbp6     | NM_001083312 | 0.46 |
| 10533050 | Hspb8    | NM_030704    | 0.46 |
| 10499132 | Mab21l2  | NM_011839    | 0.46 |
| 10543145 | Thsd7a   | AK173072     | 0.46 |
| 10406205 | Erap1    | NM_030711    | 0.45 |
| 10541524 | Nanog    | NM_028016    | 0.45 |
| 10431915 | Slc38a4  | NM_027052    | 0.45 |
| 10601980 | Mum1l1   | NM_175541    | 0.45 |
| 10359870 | Pbx1     | NM_183355    | 0.44 |
| 10505028 | Slc44a1  | AK141895     | 0.44 |
| 10496580 | Gbp3     | NM_018734    | 0.44 |
| 10576495 | Trim67   | BC094596     | 0.44 |
| 10604576 | Gpc3     | NM_016697    | 0.43 |
| 10429564 | Ly6a     | NM_010738    | 0.43 |
| 10544089 | Zc3hav1  | NM_028864    | 0.42 |
| 10449807 | Abhd9    | NM_001033163 | 0.42 |
| 10496555 | Gbp1     | NM_010259    | 0.42 |
| 10362097 | H60b     | AB284505     | 0.42 |
| 10474229 | Cd59a    | NM_001111060 | 0.42 |
| 10570957 | Sfrp1    | NM_013834    | 0.42 |
| 10534667 | Serpine1 | NM_008871    | 0.42 |
| 10464905 | Npas4    | NM_153553    | 0.41 |

|          |          |                    |      |
|----------|----------|--------------------|------|
| 10472688 | Sp5      | NM_022435          | 0.41 |
| 10497149 | Gpr177   | NM_026582          | 0.41 |
| 10607562 | Cnksr2   | NM_177751          | 0.41 |
| 10357137 | Gli2     | NM_001081125       | 0.40 |
| 10603208 | Mid1     | NM_010797          | 0.40 |
| 10538590 | Herc5    | ENSMUST00000031817 | 0.40 |
| 10509163 | Id3      | NM_008321          | 0.40 |
| 10496592 | Gbp2     | NM_010260          | 0.39 |
| 10603289 | Cln5     | NM_016691          | 0.39 |
| 10352302 | Lefty2   | NM_177099          | 0.39 |
| 10438603 | Igf2bp2  | NM_183029          | 0.39 |
| 10521471 | Ppp2r2c  | NM_172994          | 0.39 |
| 10549964 | Zscan4c  | NM_001013765       | 0.38 |
| 10371379 | Nuak1    | NM_001004363       | 0.38 |
| 10544596 | Tmem176b | NM_023056          | 0.38 |
| 10531420 | Cxcl11   | NM_019494          | 0.38 |
| 10578829 | Palld    | NM_001081390       | 0.38 |
| 10549972 | Zscan4c  | NM_001013765       | 0.38 |
| 10607587 | Pdha1    | NM_008810          | 0.37 |
| 10587639 | Nt5e     | NM_011851          | 0.37 |
| 10469167 | Sfmbt2   | NM_177386          | 0.37 |
| 10429568 | Ly6c1    | NM_010741          | 0.37 |
| 10498018 | Pcdh18   | NM_130448          | 0.36 |
| 10344966 | Ly96     | NM_016923          | 0.36 |
| 10592251 | Pknox2   | NM_001029838       | 0.36 |
| 10477920 | Myl9     | NM_172118          | 0.36 |
| 10607524 | Sms      | NM_009214          | 0.35 |
| 10361358 | Rgs17    | NM_019958          | 0.35 |
| 10583809 | Cnn1     | NM_009922          | 0.34 |
| 10604844 | Sms      | AF031486           | 0.34 |
| 10559978 | Zscan4c  | NM_001013765       | 0.34 |
| 10428619 | Enpp2    | NM_015744          | 0.34 |
| 10384223 | Igfbp3   | NM_008343          | 0.33 |
| 10407435 | Akr1c18  | NM_134066          | 0.33 |
| 10604551 | Usp26    | NM_031388          | 0.33 |
| 10445293 | Pla2g7   | NM_013737          | 0.33 |
| 10477250 | Hck      | NM_010407          | 0.32 |
| 10397984 | Ppp4r4   | NM_028980          | 0.32 |
| 10376950 | Pmp22    | NM_008885          | 0.31 |
| 10459335 | Fam38b   | BC147606           | 0.30 |
| 10360920 | Tgfb2    | NM_009367          | 0.30 |

|          |         |              |      |
|----------|---------|--------------|------|
| 10344952 | Rdh10   | NM_133832    | 0.29 |
| 10607619 | Cdk15   | NM_001024624 | 0.29 |
| 10374777 | Efemp1  | NM_146015    | 0.28 |
| 10593123 | Tagln   | NM_011526    | 0.26 |
| 10404429 | Serpib9 | NM_009256    | 0.26 |
| 10599348 | Gria3   | NM_016886    | 0.26 |
| 10602772 | Rps6ka3 | NM_148945    | 0.26 |
| 10467124 | Acta2   | NM_007392    | 0.26 |
| 10387855 | Alox15  | NM_009660    | 0.25 |
| 10493850 | Spr2a   | NM_011468    | 0.23 |
| 10602977 | Scml2   | NM_133194    | 0.16 |
| 10569335 | H19     | NR_001592    | 0.15 |
| 10608138 | Ddx3y   | NM_012008    | 0.09 |
| 10608107 | Uty     | NM_009484    | 0.08 |
| 10441669 | T       | NM_009309    | 0.07 |
| 10477986 | Nnat    | NM_010923    | 0.05 |

**Table S4.** KEGG pathways repressed in response to *Mkl2* deletion by Gene Set Enrichment Analysis

| KEGG pathways (From MsigDB)                               | Number of genes | Normalized Enrichment Score (NES) | Nominal P value | FDR q-val |
|-----------------------------------------------------------|-----------------|-----------------------------------|-----------------|-----------|
| HSA04350 TGF BETA SIGNALING PATHWAY                       | 84              | -2.067                            | 0.0000          | 0.0000    |
| HSA04360 AXON GUIDANCE                                    | 125             | -1.982                            | 0.0000          | 0.0021    |
| HSA04340 HEDGEHOG SIGNALING PATHWAY                       | 53              | -1.942                            | 0.0000          | 0.0066    |
| HSA05217 BASAL CELL CARCINOMA                             | 53              | -1.900                            | 0.0000          | 0.0109    |
| HSA04510 FOCAL ADHESION                                   | 182             | -1.774                            | 0.0000          | 0.0656    |
| HSA04010 MAPK SIGNALING PATHWAY                           | 231             | -1.745                            | 0.0000          | 0.0785    |
| HSA04310 WNT SIGNALING PATHWAY                            | 133             | -1.741                            | 0.0000          | 0.0696    |
| HSA01030 GLYCAN STRUCTURES BIOSYNTHESIS 1                 | 102             | -1.722                            | 0.0000          | 0.0754    |
| HSA00510 N GLYCAN BIOSYNTHESIS                            | 36              | -1.713                            | 0.0102          | 0.0725    |
| HSA05212 PANCREATIC CANCER                                | 70              | -1.712                            | 0.0029          | 0.0661    |
| HSA04110 CELL CYCLE                                       | 102             | -1.712                            | 0.0014          | 0.0601    |
| HSA05210 COLORECTAL CANCER                                | 78              | -1.689                            | 0.0014          | 0.0698    |
| HSA00640 PROPANOATE METABOLISM                            | 30              | -1.677                            | 0.0107          | 0.0731    |
| HSA04320 DORSO VENTRAL AXIS FORMATION                     | 26              | -1.677                            | 0.0101          | 0.0679    |
| HSA04662 B CELL RECEPTOR SIGNALING PATHWAY                | 60              | -1.662                            | 0.0030          | 0.0741    |
| HSA05130 PATHOGENIC ESCHERICHIA COLI INFECTION EHEC       | 41              | -1.642                            | 0.0114          | 0.0845    |
| HSA04810 REGULATION OF ACTIN CYTOSKELETON                 | 186             | -1.619                            | 0.0026          | 0.0964    |
| HSA04520 ADHERENS JUNCTION                                | 70              | -1.618                            | 0.0073          | 0.0921    |
| HSA00760 NICOTINATE AND NICOTINAMIDE METABOLISM           | 21              | -1.612                            | 0.0269          | 0.0910    |
| HSA04916 MELANOGENESIS                                    | 89              | -1.596                            | 0.0088          | 0.0999    |
| HSA05131 PATHOGENIC ESCHERICHIA COLI INFECTION EPEC       | 41              | -1.589                            | 0.0144          | 0.1018    |
| HSA00410 BETA ALANINE METABOLISM                          | 24              | -1.589                            | 0.0339          | 0.0975    |
| HSA00563 GLYCOSYLPHOSPHATIDYLINOSITOL ANCHOR BIOSYNTHESIS | 19              | -1.586                            | 0.0204          | 0.0963    |
| HSA00100 BIOSYNTHESIS OF STEROIDS                         | 22              | -1.558                            | 0.0383          | 0.1162    |
| HSA04530 TIGHT JUNCTION                                   | 114             | -1.555                            | 0.0055          | 0.1147    |
| HSA00561 GLYCEROLIPID METABOLISM                          | 46              | -1.533                            | 0.0411          | 0.1316    |
| HSA05220 CHRONIC MYELOID LEUKEMIA                         | 71              | -1.532                            | 0.0177          | 0.1281    |
| HSA00512 O GLYCAN BIOSYNTHESIS                            | 28              | -1.521                            | 0.0369          | 0.1339    |
| HSA04620 TOLL LIKE RECEPTOR SIGNALING PATHWAY             | 88              | -1.511                            | 0.0226          | 0.1399    |
| HSA04060 CYTOKINE CYTOKINE RECEPTOR INTERACTION           | 208             | -1.510                            | 0.0063          | 0.1359    |
| HSA00280 VALINE LEUCINE AND ISOLEUCINE DEGRADATION        | 40              | -1.505                            | 0.0305          | 0.1361    |
| HSA01031 GLYCAN STRUCTURES BIOSYNTHESIS 2                 | 51              | -1.501                            | 0.0250          | 0.1358    |
| HSA05221 ACUTE MYELOID LEUKEMIA                           | 49              | -1.495                            | 0.0363          | 0.1383    |
| HSA04150 MTOR SIGNALING PATHWAY                           | 42              | -1.493                            | 0.0422          | 0.1361    |
| HSA05010 ALZHEIMERS DISEASE                               | 27              | -1.462                            | 0.0677          | 0.1653    |
| HSA05211 RENAL CELL CARCINOMA                             | 67              | -1.459                            | 0.0427          | 0.1631    |

|                                                    |     |        |        |        |
|----------------------------------------------------|-----|--------|--------|--------|
| HSA00380 TRYPTOPHAN METABOLISM                     | 50  | -1.456 | 0.0541 | 0.1626 |
| HSA00530 AMINOSUGARS METABOLISM                    | 26  | -1.447 | 0.0689 | 0.1687 |
| HSA04115 P53 SIGNALING PATHWAY                     | 57  | -1.439 | 0.0365 | 0.1754 |
| HSA00252 ALANINE AND ASPARTATE METABOLISM          | 29  | -1.433 | 0.0733 | 0.1770 |
| HSA04660 T CELL RECEPTOR SIGNALING PATHWAY         | 89  | -1.425 | 0.0418 | 0.1832 |
| HSA00230 PURINE METABOLISM                         | 137 | -1.409 | 0.0332 | 0.1976 |
| HSA00120 BILE ACID BIOSYNTHESIS                    | 31  | -1.381 | 0.0983 | 0.2312 |
| HSA00251 GLUTAMATE METABOLISM                      | 30  | -1.378 | 0.0992 | 0.2301 |
| HSA00650 BUTANOATE METABOLISM                      | 42  | -1.378 | 0.0970 | 0.2251 |
| HSA04120 UBIQUITIN MEDIATED PROTEOLYSIS            | 34  | -1.376 | 0.0902 | 0.2239 |
| HSA04930 TYPE II DIABETES MELLITUS                 | 41  | -1.375 | 0.0927 | 0.2197 |
| HSA00600 SPHINGOLIPID METABOLISM                   | 33  | -1.374 | 0.1128 | 0.2168 |
| HSA00020 CITRATE CYCLE                             | 25  | -1.363 | 0.1036 | 0.2261 |
| HSA03320 PPAR SIGNALING PATHWAY                    | 57  | -1.356 | 0.0922 | 0.2324 |
| HSA04330 NOTCH SIGNALING PATHWAY                   | 39  | -1.346 | 0.1049 | 0.2411 |
| HSA04130 SNARE INTERACTIONS IN VESICULAR TRANSPORT | 30  | -1.345 | 0.1197 | 0.2373 |
| HSA04920 ADIPOCYTOKINE SIGNALING PATHWAY           | 68  | -1.342 | 0.0708 | 0.2370 |
| HSA00340 HISTIDINE METABOLISM                      | 36  | -1.336 | 0.1130 | 0.2405 |
| HSA04630 JAK STAT SIGNALING PATHWAY                | 132 | -1.326 | 0.0523 | 0.2493 |
